# Supplementary material
Source: PubMed Central journal article supplement (PMC3790621)
Supplement: supp_jc.2013-1279_JC-13-1279_tab1_appx.pdf [file supp_jc.2013-1279_JC-13-1279_tab1_appx.pdf]

## Online Appendix

### Rationale for the selection of *HNF1A*, *HNF4A*, and *GCK*, for testing in the SEARCH population

We tested for MODY mutations in the three most common genes which account for approximately 99% of all MODY that is not associated with syndromic features.[1] There is strong evidence from our and other series that testing other genes would not add significantly to the number of cases that would be found; this evidence is detailed below. ***IPF1* mutations** were initially described in a single family [2] and have not been described in any other MODY families since, despite testing in large series of French, Japanese and UK MODY subjects.[1,3-4] ***HNF1B* mutations** are very rare in MODY [5] and in all the cases found in the UK series,[1] the patients had renal disease (usually renal cysts) and other features of a multi-system syndrome including female genital malformations, hyperuricemia, pancreatic atrophy, and abnormal liver function tests.[6] ***NeuroD1* mutations** are very rare with only one convincing description of a mutation in an Icelandic pedigree;[7] mutations in this gene have not been associated with MODY in large international series.[8-10] **Mutations in *CEL*** result in exocrine pancreatic dysfunction as well as MODY and have only been seen unequivocally in 2 MODY families,[11] despite testing in 240 MODY families in which the genetic etiology is unknown.[12] In summary, the extreme rarity of mutations in the genes not tested - even in well selected series of MODY patients - means that testing them in this large unselected population of children with diabetes would be extremely unlikely to result in any additional cases.

In addition, *HNF1A*, *HNF4A* and *GCK* are the only three MODY subtypes for which the detection of MODY will result in a change of treatment, as there are specific treatments that apply to persons with these three MODY genes but not to persons with any of the very rare subtypes. On the basis of the prevalence and the implications of identifying persons with these mutations, the European clinical practice guidelines recommend that MODY genetic testing be performed only for these three subtypes unless there are clear non-diabetes related features suggesting other very rare causes.[13] Therefore in clinical diagnostic laboratories, we do not test for the other genes in cases of diabetes alone.

### Online references

- [1] Shields B, Hicks S, Shepherd M, Colclough K, Hattersley A, Ellard S. Maturity-onset diabetes of the young (MODY): How many cases are we missing? *Diabetologia*. 2010;53(12):2504-2508.
- [2] Stoffers DA, Ferrer J, Clarke WL, Habener JF. Early-onset type 2 diabetes mellitus (MODY4) linked to *IPF1*. *Nat Genet*. 1997;17(2):138-139.
- [3] Chèvre JC, Hani EH, Stoffers DA, Habener JF, Froguel P. Insulin promoter factor 1 gene is not a major cause of maturity-onset diabetes of the young in French caucasians. *Diabetes*. 1998;47(5):843-844.
- [4] Hara M, Lindner TH, Paz VP, et al. Mutations in the coding region of the insulin promoter factor 1 gene are not a common cause of maturity-onset diabetes of the young in Japanese subjects. *Diabetes*. 1998;47(5):845-846.
- [5] Beards F, Frayling T, Bulman M, et al. Mutations in hepatocyte nuclear factor-1 $\beta$  are not a common cause of maturity-onset diabetes of the young in the UK. *Diabetes*. 1998;47(7):1152-1154.
- [6] Bingham C, Hattersley AT. Renal cysts and diabetes syndrome resulting from mutations in hepatocyte nuclear factor-1 $\beta$ . *Nephrol Dial Transplant*. 2004;19(11):2703-2708.
- [7] Kristinsson SY, Thorolfsson ET, Talseth B, et al. Mody in Iceland is associated with mutations in *HNF-1 $\alpha$*  and a novel mutation in *NeuroD1*. *Diabetologia*. 2001;44(11):2098-2103.
- [8] Dupont S, Vionnet N, Chèvre JC, et al. No evidence of linkage or diabetes-associated mutations in the transcription factors *BETA2/NeuroD1* and *PAX4* in type 2 diabetes in France. *Diabetologia*. 1999;42(4):480-484.
- [9] Furuta H, Horikawa Y, Iwasaki N, et al. Beta-cell transcription factors and diabetes: Mutations in the coding region of the *BETA2/NeuroD1* (*NEUROD1*) and *Nkx2.2* (*NKX2B*) genes are not associated with maturity-onset diabetes of the young in Japanese. *Diabetes*. 1998;47(8):1356-1358.
- [10] Sagen JV, Baumann ME, Salvesen HB, Molven A, Søvik O, Njølstad PR. Diagnostic screening of *NeuroD1* (*MODY6*) in subjects with MODY or gestational diabetes mellitus. *Diabet Med*. 2005;22(8):1012-1015.
- [11] Ræder H, Johansson S, Holm PI, et al. Mutations in the *CEL* VNTR cause a syndrome of diabetes and pancreatic exocrine dysfunction. *Nat Genet*. 2006;38(1):54-62.
- [12] Torsvik J, Johansson S, Johansen A, et al. Mutations in the VNTR of the carboxyl-ester lipase gene (*CEL*) are a rare cause of monogenic diabetes. *Hum Genet*. 2010;127(1):55-64.
- [13] Ellard S, Bellanné-Chantelot C, Hattersley A. Best practice guidelines for the molecular genetic diagnosis of maturity-onset diabetes of the young. *Diabetologia*. 2008;51(4):546-553.

**Table 1: *HNF1A*, *HNF4A* and *GCK* mutations identified by genetic testing in SEARCH**

| Patient             | Mutation (Nucleotide description) | Novel missense mutation or in-frame deletion |
|---------------------|-----------------------------------|----------------------------------------------|
| <b><i>HNF1A</i></b> |                                   |                                              |
| 1                   | G31D (c.92G>A)                    |                                              |
| 2                   | G31D (c.92G>A)                    |                                              |

|                     |                                                            |     |
|---------------------|------------------------------------------------------------|-----|
| 3                   | G52A (c.155G>C)                                            | Yes |
| 4                   | R54X (c.160C>T)                                            |     |
| 5                   | E59X (c.175G>T)                                            |     |
| 6                   | T82M (c.245C>T)                                            |     |
| 7                   | P112L (c.335C>T)                                           |     |
| 8                   | R114H (c.341G>A)                                           |     |
| 9                   | R159W (c.475C>T)                                           |     |
| 10                  | Q182X (c.544C>T)                                           |     |
| 11                  | R200Q (c.599G>A)                                           |     |
| 12                  | R203H (c.608G>A)                                           |     |
| 13                  | I242T (c.725T>C)                                           | Yes |
| 14                  | S249P (c.745T>C)                                           |     |
| 15                  | V259F (c.775G>T)                                           |     |
| 16                  | R263C (c.787C>T)                                           |     |
| 17                  | W267S (c.800G>C)                                           | Yes |
| 18                  | P291Q (c.872C>A)                                           | Yes |
| 19                  | P291fsinsC (c.872dup)                                      |     |
| 20                  | P291fsinsC (c.872dup)                                      |     |
| 21*                 | P291fsinsC (c.872dup) and<br><i>HNF4A</i> R127W (c.379C>T) |     |
| 22**                | Y322C (c.965A>G) (+) L389V (c.1165T>G)                     |     |
| 23                  | G375V (c.1124G>T)                                          | Yes |
| 24                  | L502V (c.1504C>G)                                          | Yes |
| 25                  | R583Q (c.1748G>A)                                          |     |
| 26                  | K226del (c.676delAAG)                                      | Yes |
| <b><i>HNF4A</i></b> |                                                            |     |
| 1                   | R80Q (c.239G>A)                                            |     |
| 2                   | R104fsinsAGdelC(c.310delCinsAG)                            |     |
| 3                   | R127W (c.379C>T)                                           |     |
| 4                   | R168Q (c.503G>A)                                           | Yes |
| 5                   | L260P (c.779T>C)                                           | Yes |
| 6                   | E276X (c.826G>T)                                           |     |
| 7                   | V395I (c.1183G>A)                                          | Yes |
| <b><i>GCK</i></b>   |                                                            |     |
| 1                   | K15M (c.44A>T)                                             | Yes |
| 2                   | V62A (c.185T>C)                                            |     |
| 3                   | I130T (c.389T>C)                                           |     |
| 4                   | V182M (c.544G>A)                                           |     |
| 5                   | G178E (c.533G>A)                                           |     |
| 6                   | M202T (c.605T>C)                                           |     |
| 7                   | V226M (c.676G>A)                                           |     |
| 8                   | R250C (c.748C>T)                                           |     |
| 9                   | V335fsdelG (c.1003delG)                                    |     |
| 10                  | A387E (c.1160C>A)                                          |     |
| 11                  | V389D (c.1166T>A)                                          |     |
| 12                  | IVS4-2A>T (c.484-2A>T)                                     |     |
| 13                  | R422L (c.1265G>T)                                          | Yes |
| 14                  | G385fsdelG (c.1155delG)                                    |     |

\*Mutations in both *HNF1A* and *HNF4A*; \*\*Two different mutations in *HNF1A*
